# Supplementary material for: Rice transposable elements are characterized by various methylation environments in the genome
Source: PubMed Central journal article supplement (PMC2222647; doi:10.1186/1471-2164-8-469), 2007-12-20
Supplement: 1471-2164-8-469-S1.pdf [file 1471-2164-8-469-S1.pdf]

Additional file 1 The 60-bp consensus sequences of the 5' end of 12 TEs

| TE       | Consensus sequences                                           | Sequence no. (1) |
|----------|---------------------------------------------------------------|------------------|
| noaCRR   | TGATGTGACCATGGCTACTACGGATACAACCATTGCTCACATCATGAATCAACAAGAAGA  | 63               |
| RIRE5    | TGTTAGATTAATGGGCTAGGCCCAATTAAATCCTAATAAATTCATTGGCCCACATTAAG   | 69               |
| RIRE7    | TGATGAGGACATCCCTTCCAACGATACAACCACGCCTATTGCACAGCAAGGACCAATGAC  | 38               |
| p-SINE   | GAGAAATGCCCAGGGGTCTTCCGGCTAGCTCCACAAGGTGGTGGGCTAGACGACCTGGGT  | 30               |
| Akan     | CAAGGTTGTCAGTATCCCGATTTCGTATCCTAGTATCTTACGATACTACGATCCTACCAAG | 19               |
| Kiddo    | CTCCCTCCGTACTCGTAAAGGAAGTCGTTTAGGACAGCGACACGGTCTCCAAAACACAAC  | 24               |
| Kiserul  | GGGGCTGTTTGGTTCCAGCCACACTTTACCATTACTTGCCAACAAAAGTTGCCACACCT   | 63               |
| mPing    | GGCCAGTCACAATGGGGGTTTCACTGGTGTGTCATGCACATTTAATAGGGGTAAGACTGA  | 35               |
| Mashu    | GAGCACCCGCAATGGTAAAGTAAGGTGCTATCTATAAAACATGTACATCTCAGCAATAGA  | 100              |
| Tabitoll | GGCCGTGTTTAGTTCCAAACTTTTTCTTCCAAACTTCAACTTTTCCATCACATCAAAACT  | 100              |
| Toya     | CAGTGGCGGATTTAGGCCATTTCTGTGGGGTCGGCTGACCCACAGCTTTTTGAAAAACA   | 11               |
| Basho    | CTAGCATGGTGGCCCGCGCAGATTGCGCGGCTAGCATCATTATATTTTCTCTCATATAAT  | 40               |

1: The numbers of sequences obtained from the rice databases to prepare the consensus sequences.
