# Supplementary material for: Rice transposable elements are characterized by various methylation environments in the genome
Source: PubMed Central journal article supplement (PMC2222647; doi:10.1186/1471-2164-8-469), 2007-12-20
Supplement: 1471-2164-8-469-S2.pdf [file 1471-2164-8-469-S2.pdf]

## Additional file 2

## Primers used in this study

| Name of primer         | Sequence(5'→3')               |
|------------------------|-------------------------------|
| HpaII/MspI adaptor 1st | GTAATACGACTCACTATAGGGC        |
| HpaII/MspI adaptor 2nd | GTGCTTGATGCTTGAAAACGG         |
| noaCRR 1st             | CAATGGTTGTATCCGTAGTAGC        |
| noaCRR 2nd             | AATGGTTGTATCCGTAGTAGCC        |
| RIRE5 1st              | AATTGGGCCTAGCCCATTAATC        |
| RIRE5 2nd              | GGGCCTAGCCCATTAATCTAAC        |
| RIRE7 1st              | AATAGGCGTGGTTGTATCGTTGG       |
| RIRE7 2nd              | TGGTTGTATCGTTGGAAGGGATGTC     |
| p-SINE 1st             | TGTGGAGCTAGCCGGAAGAC          |
| p-SINE 2nd             | AGCTAGCCGGAAGACCCCTG          |
| Akan 1st               | ATCGTAAGATACTAGGATAC          |
| Akan 2nd               | ACTAGGATACGAATCGGGATAC        |
| Kiddo 1st              | CAAGTAATGGTAAAGTGTGGCTGGG     |
| Kiddo 2nd              | AATGGTAAAGTGTGGCTGGGAAC       |
| Kiseru I 1st           | TCGCTGTCCTAAACGACTTC          |
| Kiseru I 2nd           | TGTCCTAAACGACTTCCTTTACG       |
| mPing 1st              | ACACCAGTGAAACCCCCATTG         |
| mPing 2nd              | AGTGAAACCCCCATTGTGACTG        |
| Mashu 1st              | ATAGATAGCACCTTACTTTACCATTG    |
| Mashu 2nd              | CCTTACTTTACCATTGTGGGTGCTC     |
| Tabitoll 1st           | GATGGAAAAGTTGRAAGTTTGAAGAAAAG |
| Tabitoll 2nd           | TTGAAGAAAAGTTWGGAATAAACWCGGC  |
| Toya 1st               | CACAGAAATGGCCTAAATCC          |
| Toya 2nd               | CAGAAATGGCCTAAATCCGC          |
| Basho 1st              | GAGAGAAAATATAATGATGCTAGCCG    |
| Basho 2nd              | AATCTGCGCGGGCCACCAT           |
